# Supplementary material for: Surface engineering of a triboelectric nanogenerator for room temperature high-performance self-powered formaldehyde sensors
Source: Royal Society of Chemistry journal article supplement (doi:10.1039/d2ta04433a), 2022-01-01
Supplement: d2ta04433a1.pdf [file d2ta04433a1.pdf]

## Electronic Supplementary Information

# Surface engineering of triboelectric nanogenerator for room temperature high-performance self-powered formaldehyde sensor

Chih-Yu Chang,\* Yu-Hsuan Cheng, Chun-Yi Ho

Department of Materials Science and Engineering, National Taiwan University of Science and Technology, Taipei, 10607, Taiwan (R.O.C.) (E-mail: [cychang@gapps.ntust.edu.tw](mailto:cychang@gapps.ntust.edu.tw))

**Table S1.** XPS binding energy values and surface concentration of bpy-PMA films before and after FA exposure.

| Peak component | Mo 3d binding energy [eV]          |                                    |                                    |                                    | Mo 3d concentration [at.%]         |                                    |                                    |                                    |
|----------------|------------------------------------|------------------------------------|------------------------------------|------------------------------------|------------------------------------|------------------------------------|------------------------------------|------------------------------------|
|                | Mo <sup>6+</sup> 3d <sub>5/2</sub> | Mo <sup>6+</sup> 3d <sub>7/2</sub> | Mo <sup>5+</sup> 3d <sub>5/2</sub> | Mo <sup>5+</sup> 3d <sub>7/2</sub> | Mo <sup>6+</sup> 3d <sub>5/2</sub> | Mo <sup>6+</sup> 3d <sub>7/2</sub> | Mo <sup>5+</sup> 3d <sub>5/2</sub> | Mo <sup>5+</sup> 3d <sub>7/2</sub> |
| Before sensing | 233.4                              | 236.5                              | N.A.                               | N.A.                               | 40.68                              | 59.32                              | N.A.                               | N.A.                               |
| After sensing  | 233.3                              | 236.4                              | 235.4                              | 231.7                              | 11.06                              | 27.16                              | 23.18                              | 38.60                              |

**Table S2.** Comparison of the characteristics of state-of-the-art gas sensors based on monolithic TENG previously reported as well as the present work.

| Source    | Materials                                | Target gas      | Selectivity <sup>a</sup> | Response time [sec] <sup>a</sup> | Power density [W m <sup>-2</sup> ] <sup>a</sup> | Power [mW] <sup>a</sup>                |
|-----------|------------------------------------------|-----------------|--------------------------|----------------------------------|-------------------------------------------------|----------------------------------------|
| Ref. 1    | PDMS<br>PANI with Ce-doped ZnO           | NH <sub>3</sub> | —                        | —                                | —                                               | —                                      |
| Ref. 2    | PANI<br>PVDF                             | NH <sub>3</sub> | —                        | 40                               | —                                               | —                                      |
| Ref. 3    | PDMS<br>PEI                              | CO <sub>2</sub> | —                        | —                                | —                                               | —                                      |
| Ref. 4    | PEI<br>FEP                               | CO <sub>2</sub> | —                        | —                                | —                                               | —                                      |
| Ref. 5    | PET<br>ITO with Pd deposition            | H <sub>2</sub>  | —                        | 1800                             | —                                               | —                                      |
| Ref. 6    | PI<br>MC                                 | H <sub>2</sub>  | —                        | 82 to 88                         | —                                               | —                                      |
| Ref. 7    | Latex<br>Synthesized material            | NO <sub>2</sub> | —                        | —                                | —                                               | —                                      |
| Ref. 8    | ZnO-doped Ag<br>PDMS                     | Acetylene       | —                        | —                                | —                                               | 0.18                                   |
| Ref. 9    | Al<br>rGO-In <sub>2</sub> O <sub>3</sub> | Aniline         | —                        | 350                              | —                                               | —                                      |
| This work | PTZ/Ag NPs<br>PDMS/bpy-PMA               | Formaldehyde    | 130                      | 4.65                             | 2.97 <sup>b</sup> or 8.93 <sup>c</sup>          | 1.19 <sup>b</sup> or 3.57 <sup>c</sup> |

<sup>a</sup> “—” in the table implies that the data are not recorded in research.

<sup>b</sup> The dielectric layer is PDMS planar film functionalized with bpy-PMA.

<sup>c</sup> The dielectric layer is PDMS nanopillar arrays functionalized with bpy-PMA.

**Table S3.** Comparison of the characteristics of state-of-the-art FA sensors previously reported as well as the present work.

| Source    | Sensing materials                                                         | Self-powered mode | Working temperature [°C] | Selectivity <sup>a</sup> | Response time [sec] <sup>a</sup> |
|-----------|---------------------------------------------------------------------------|-------------------|--------------------------|--------------------------|----------------------------------|
| Ref. 10   | SnO <sub>2</sub> /rGO nanocomposites                                      | No                | 160                      | —                        | <10 (<25 ppm)                    |
| Ref. 11   | Zn <sub>2</sub> SnO <sub>4</sub> /SnO <sub>2</sub> hierarchical structure | No                | 200                      | —                        | 76 (20 ppm)                      |
| Ref. 12   | rGO/ZnSnO <sub>3</sub> microspheres                                       | No                | 103                      | —                        | 31 (10 ppm)                      |
| Ref. 13   | ZnO@ZIF-8 nanorod                                                         | No                | 300                      | 4                        | 14 (100 ppm)                     |
| Ref. 14   | ZnO micro-octahedrons                                                     | No                | 400                      | —                        | <46 (200 ppm)                    |
| Ref. 15   | In <sub>2</sub> O <sub>3</sub> hierarchical architectures                 | No                | 260                      | —                        | 1 (100 ppm)                      |
| Ref. 16   | Ag-ZnO nanocomposites                                                     | No                | 240                      | —                        | 12 (100 ppm)                     |
| Ref. 17   | SnO <sub>2</sub> nanosheets                                               | No                | 200                      | 101                      | 30 (200 ppm)                     |
| Ref. 18   | rGO/TiO <sub>2</sub> nanosheet                                            | No                | ≈25                      | —                        | 65 (0.5 ppm)                     |
| Ref. 19   | SnO <sub>2</sub> with lamellar and plicated membranes                     | No                | 200                      | —                        | 50 (10 ppm)                      |
| Ref. 20   | Co <sub>3</sub> O <sub>4</sub> /ZnO hollow spheres with nanoparticles     | No                | 160                      | —                        | —                                |
| Ref. 21   | VG/SnO <sub>2</sub> nanoparticles                                         | No                | ≈25                      | —                        | 46 (5 ppm)                       |
| Ref. 22   | Ga-In bimetallic oxide nanofibers                                         | No                | 150                      | —                        | 1 to 14 (100 to 0.2 ppm)         |
| Ref. 23   | Co <sub>3</sub> O <sub>4</sub> /ZnO core-shell nanofibers                 | No                | 220                      | —                        | —                                |
| Ref. 24   | NiO/SnO <sub>2</sub> microspheres                                         | No                | 200                      | —                        | 6 (100 ppm)                      |
| Ref. 25   | Ni-SnO <sub>2</sub> nanoparticles                                         | No                | 200                      | —                        | —                                |
| Ref. 26   | SnO/SnO <sub>2</sub> nano-flowers assemble from nanosheets                | No                | 120                      | —                        | 18 (50 ppm)                      |
| Ref. 27   | NiO-SnO <sub>2</sub> microflowers                                         | No                | 100                      | 33                       | 7 (50 ppm)                       |
| Ref. 28   | Co-rich ZnCo <sub>2</sub> O <sub>4</sub> hollow nanospheres               | No                | 225                      | —                        | —                                |
| Ref. 29   | ZnO nanopowders                                                           | No                | 210                      | —                        | —                                |
| Ref. 30   | Li-doped NiO                                                              | No                | 600                      | —                        | 340 (0.01 ppm)                   |
| Ref. 31   | CdO activated Sn doped ZnO                                                | No                | 200                      | —                        | —                                |
| Ref. 32   | Ga doped ZnO                                                              | No                | 400                      | —                        | <300 (32 ppm)                    |
| This work | PDMS/bpy-PMA                                                              | Yes               | 25                       | 130                      | 180 (32 ppm)<br>4.65 (1 ppm)     |

<sup>a</sup> “—” in the table implies that the data are not recorded in research.

**Table S4.** Comparison of the characteristics of state-of-the-art breath sensors previously reported as well as the present work.

| Source    | Biomarker gas    | Disease     | Materials                        | Self-powered mode | Working temperature [°C] | Selectivity <sup>a</sup> | Response time [sec] |
|-----------|------------------|-------------|----------------------------------|-------------------|--------------------------|--------------------------|---------------------|
| Ref. 33   | NO               | Asthma      | Single walled CNTs               | No                | ≈25                      | —                        | 255 (485 ppb)       |
| Ref. 34   | NO <sub>2</sub>  | Asthma      | Electrochemical, etc             | No                | 250                      | —                        | 63 (5 ppm)          |
| Ref. 35   | Acetone          | Diabetes    | Ce-ZnO based                     | No                | ≈25                      | —                        | 20 (100 ppm)        |
| Ref. 36   | H <sub>2</sub> S | Halitosis   | α-Fe <sub>2</sub> O <sub>3</sub> | No                | 350                      | —                        | 30 (50 ppm)         |
| This work | Formaldehyde     | Lung cancer | PDMS/bpy-PMA                     | Yes               | 25                       | 130                      | 4.65 (1 ppm)        |

<sup>a</sup> “—” in the table implies that the data are not recorded in research.

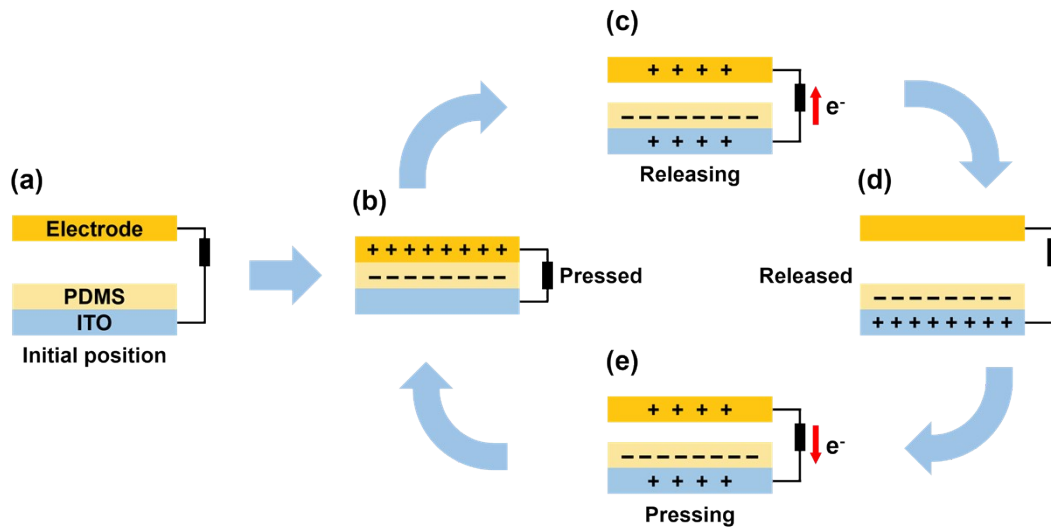

Fig. S1. Schematic illustration of working principle of electrode-to-dielectric vertical contact-separation mode TENG.

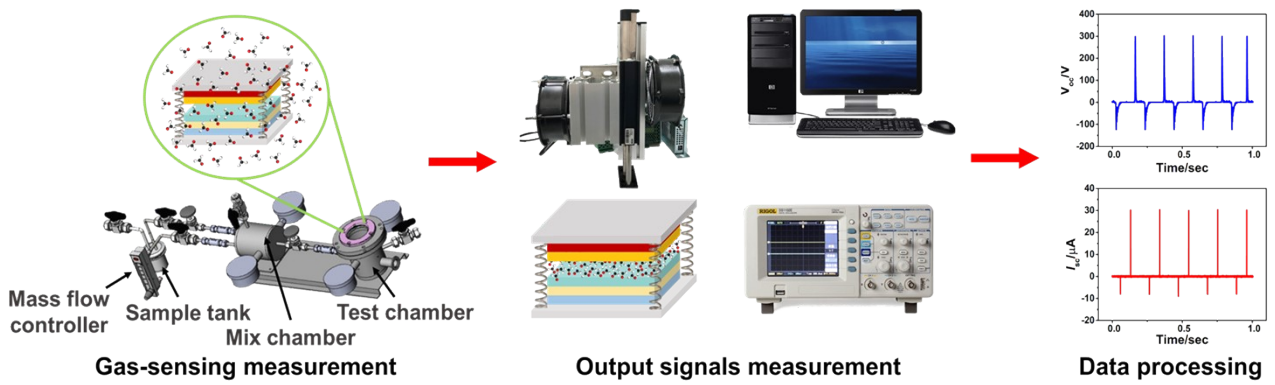

Fig. S2. Schematic illustration of the experimental setup for FA sensing.

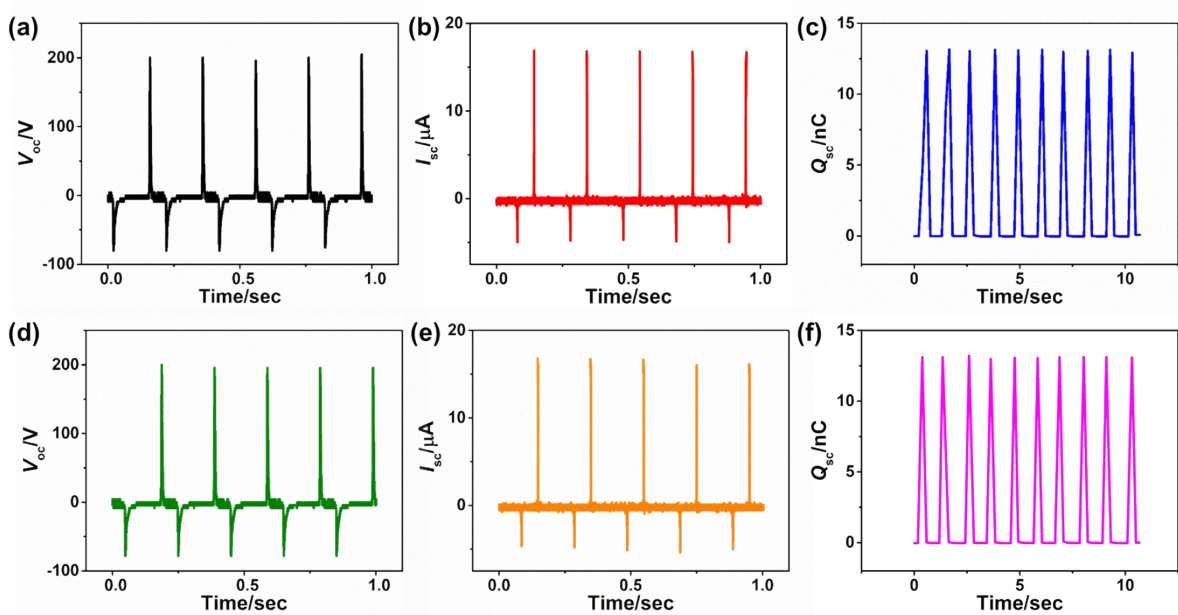

Fig. S3. Output characterization of PDMS-based TENG before (a-c) and after (d-f) FA exposure:  $V_{oc}$  (a, d),  $I_{sc}$  (b, e), and  $Q_{sc}$  (c, f).

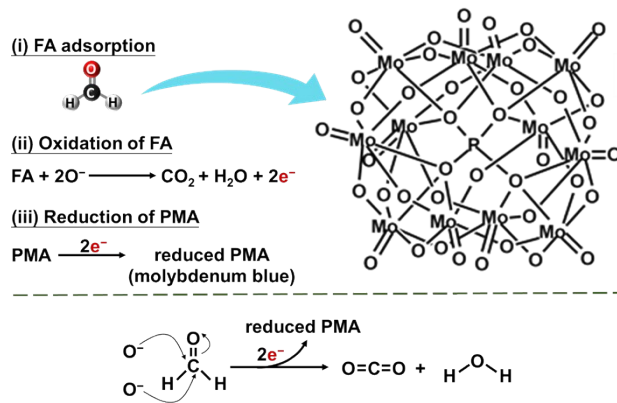

Fig. S4. The schematic illustration of the possible sensing mechanism of FA gases by PMA

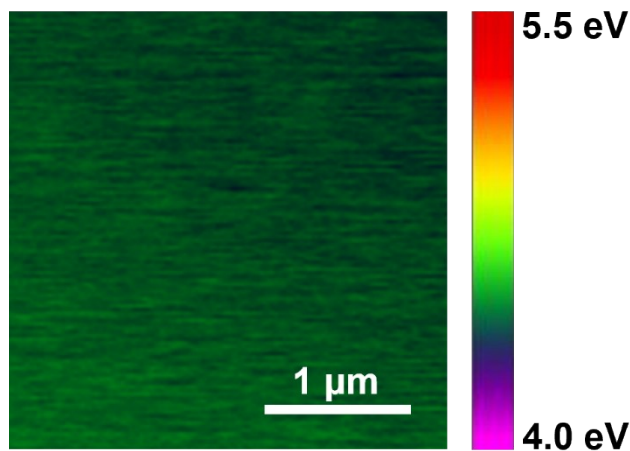

Fig. S5. KPFM image of PDMS/PMA film after FA exposure.

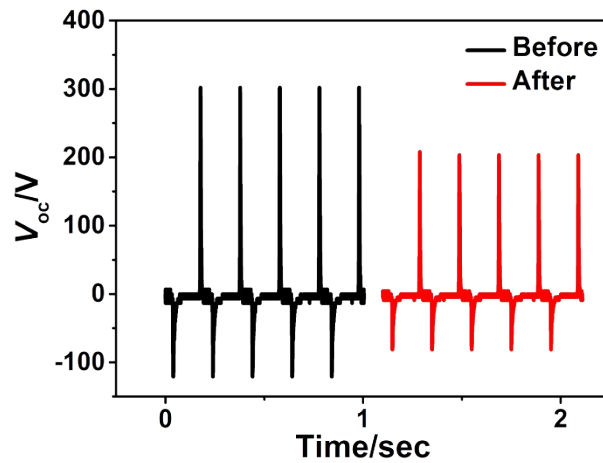

Fig. S6.  $V_{oc}$  output of the TENG (dielectric layer: PDMS/PMA, electrode: ITO/PEI) before and after exposure to high humidity atmosphere (relative humidity  $\approx 90\%$ ) for 1 hr.

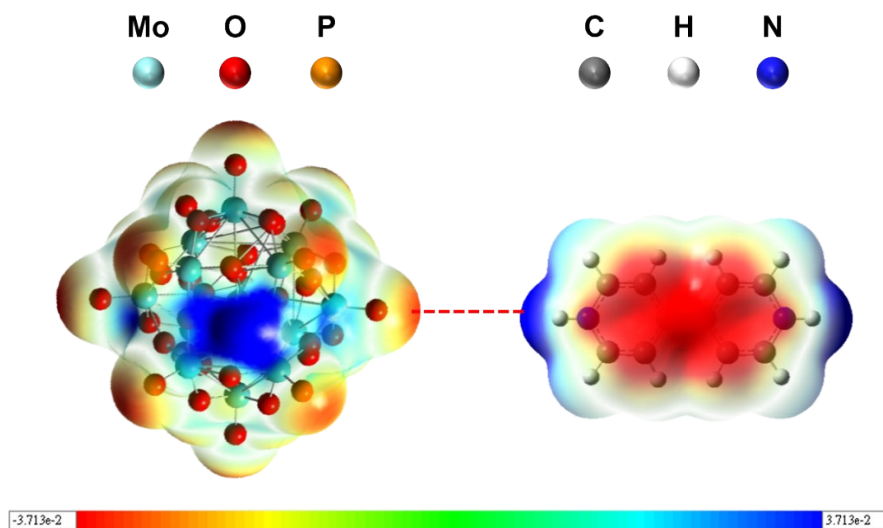

**Fig. S7.** Gaussian-calculated ESP maps of PMA anions and pyridinium (dashed line indicates the electrostatic force between the electronegative oxygen atoms of PMA anions and ammonium atoms of pyridinium).

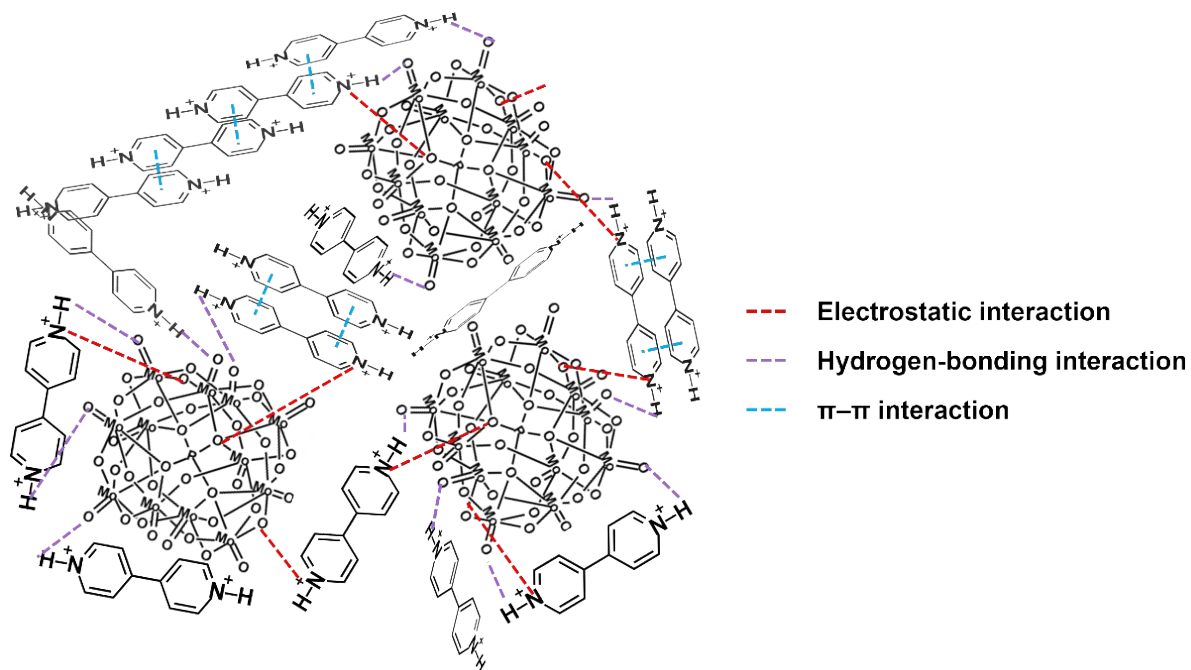

**Fig. S8.** Schematic representation of the possible interaction between PMA anions and pyridinium.

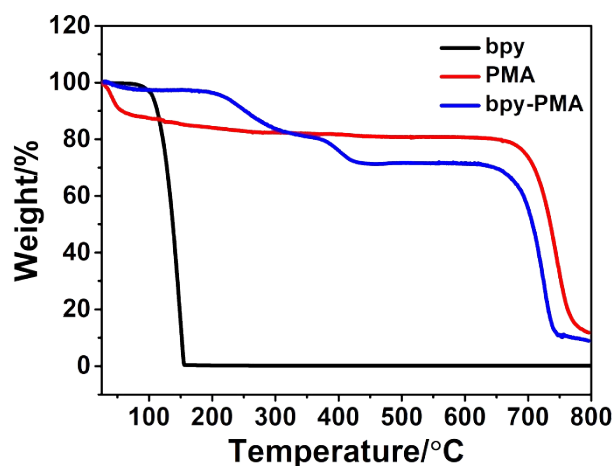

Fig. S9. Thermogravimetric analysis of bpy, PMA, and bpy-PMA.

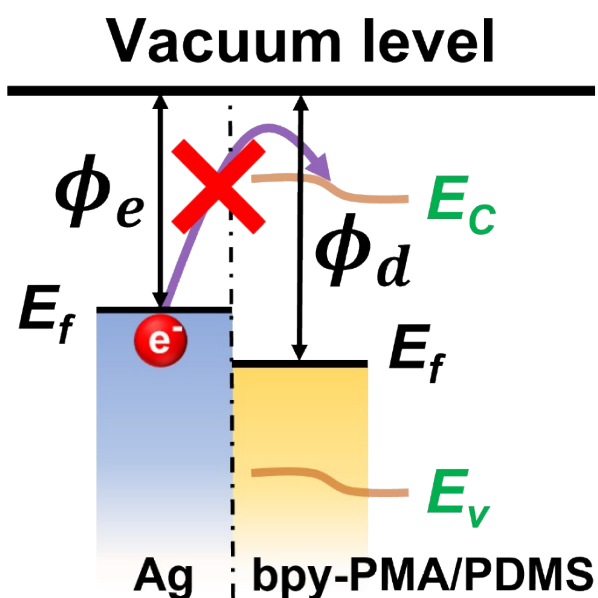

Fig. S10. Schematic energy level diagram of Ag electrode and PDMS/bpy-PMA dielectric layer.  $\Phi_e$ ,  $\Phi_d$ ,  $E_f$ ,  $E_c$  and  $E_v$  represent the work-function of electrode, work-function of dielectric layer, Fermi energy level, conduction band edge, and valence band edge, respectively.

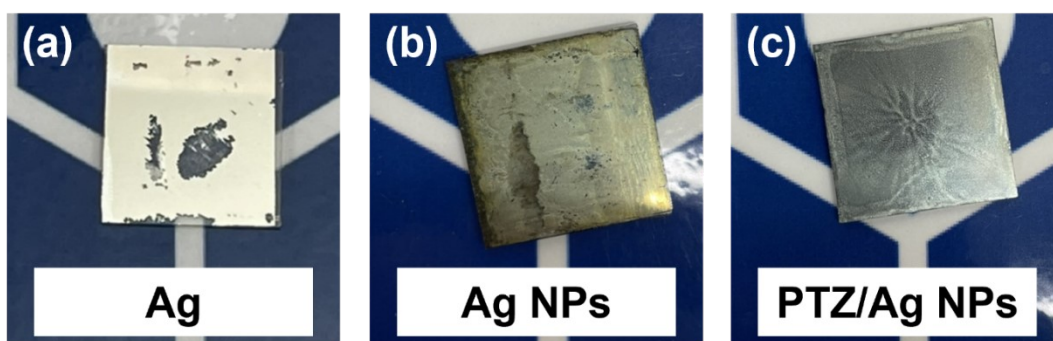

Fig. S11. Photographs of various electrode layers after 200,000 times of contact-separation operation.

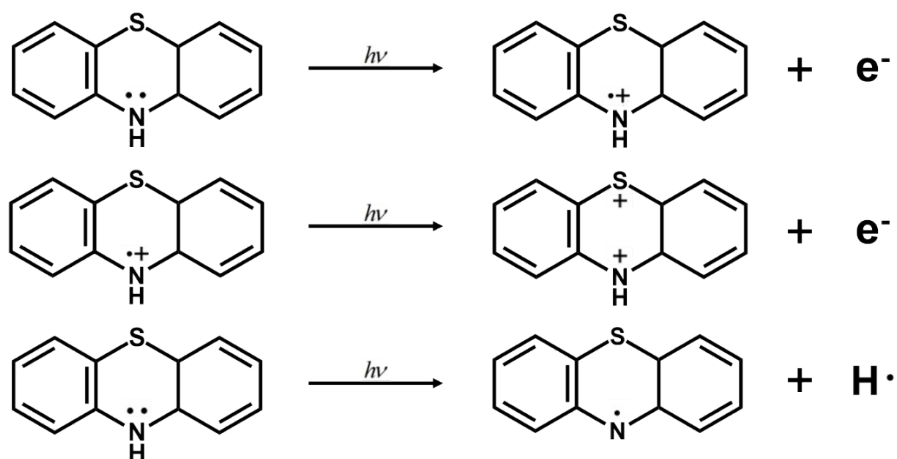

Fig. S12. Proposed mechanism for the photo-initiated reactions of PTZ.

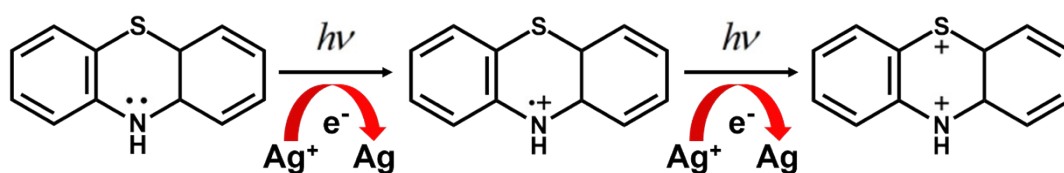

Fig. S13. Schematic representation of photoinduced reduction of  $Ag^+$  ions to Ag by PTZ.

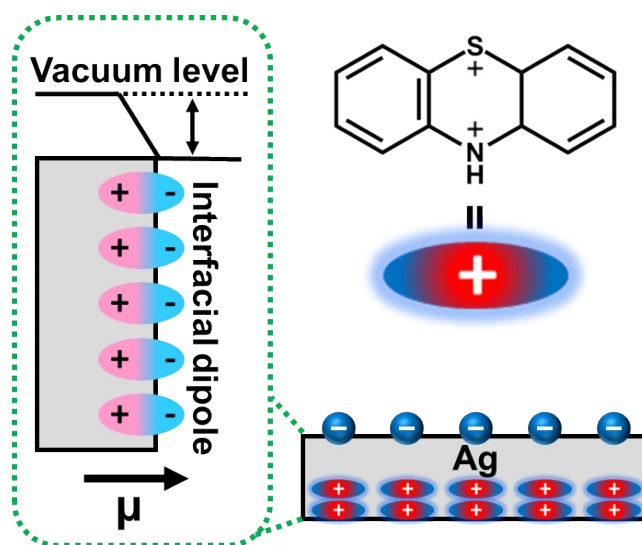

Fig. S14. Schematic illustration of WF modulation of Ag NPs film via PTZ modification

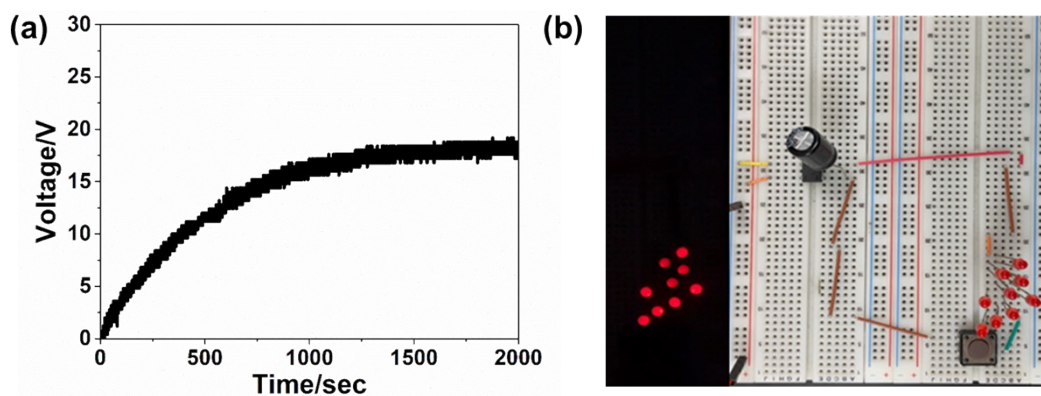

**Fig. S15.** (a) Charging curve of a capacitor connected to TENG with the rectifying circuit. (b) A photograph of commercial LEDs lit up simultaneously by charging a capacitor from the TENG.

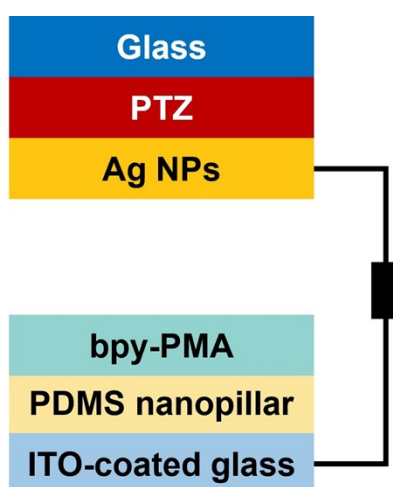

**Fig. S16.** Schematic illustration of the TENG architecture with PDMS nanopillar arrays.

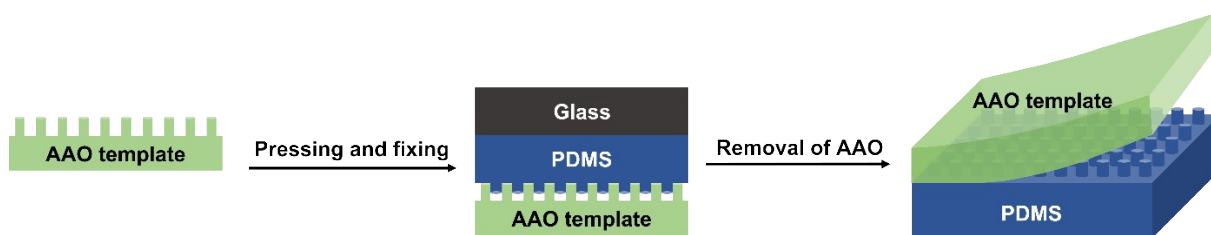

**Fig. S17.** Schematic illustration of the fabrication procedures for PDMS nanopillars via AAO template-assisted method.



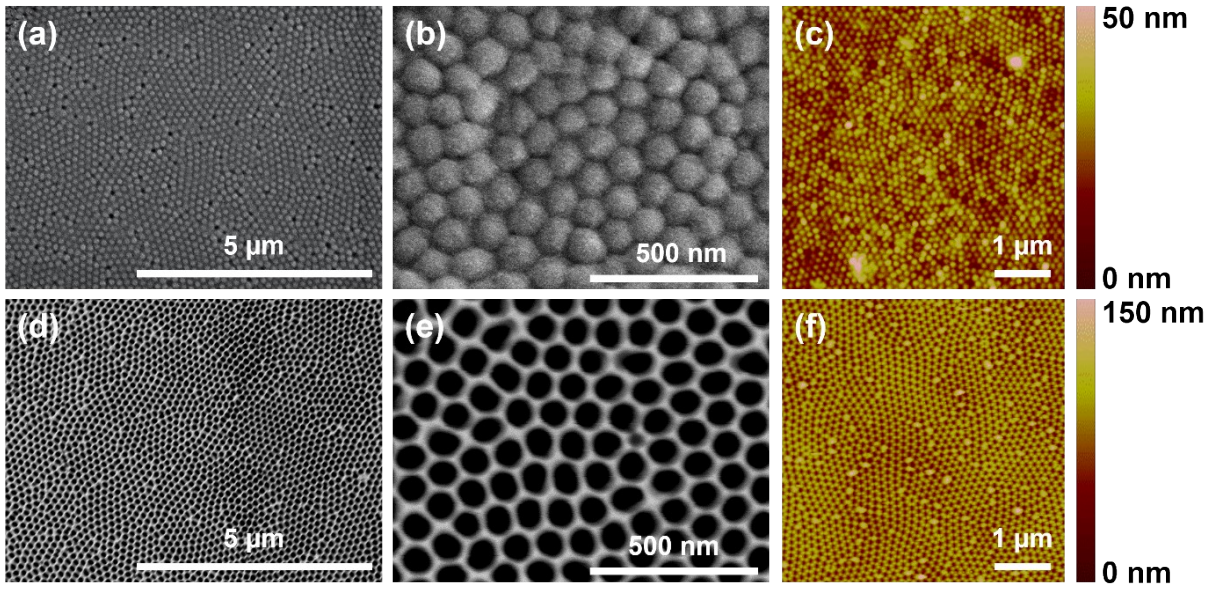

**Fig. S18.** (a, b, d, e) Top-view SEM images, and (c, f) AFM topographic images of: PDMS nanopillars (a-c), and bare AAO template (d-f).

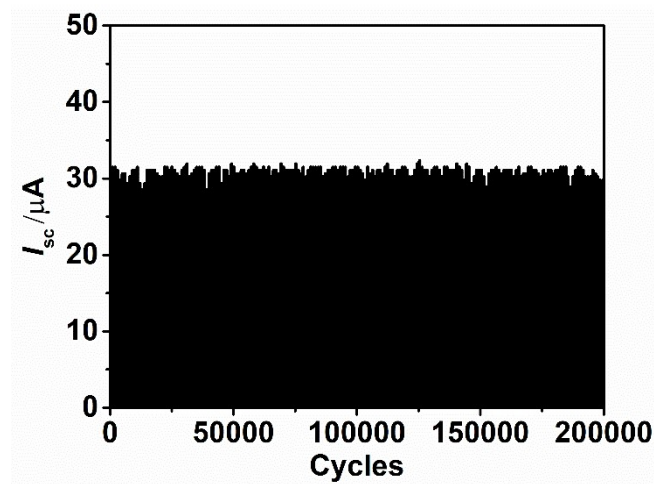

**Fig. S19.** Evolution of  $I_{sc}$  of TENG as a function of continuous operating cycles.

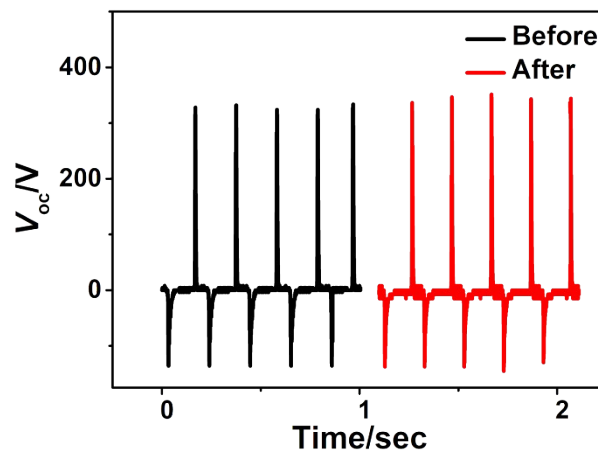

**Fig. S20.**  $V_{oc}$  output of the TENG (dielectric layer: PDMS/bpy-PMA, electrode: PTZ/Ag NPs) before and after exposure to high humidity condition (relatively humidity  $\approx 90\%$ ) for 1 hr.

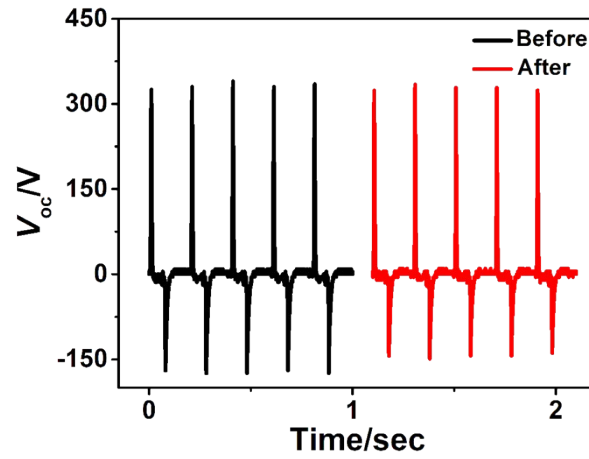

**Fig. S21.**  $V_{oc}$  output of the TENG (dielectric layer: PDMS/bpy-PMA, electrode: PTZ/Ag NPs) before and after immersion in water for 12 hr.

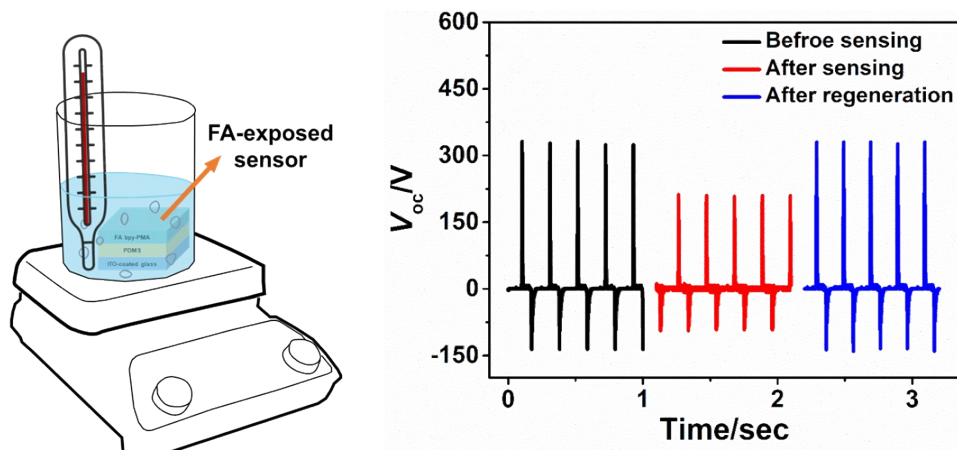

**Fig. S22.** Schematic illustration of the experimental setup used for regeneration of the active sensing layer (left panel) and  $V_{oc}$  output of the TENG (dielectric layer: PDMS/bpy-PMA, electrode: PTZ/Ag NPs) measured under different conditions (right panel).

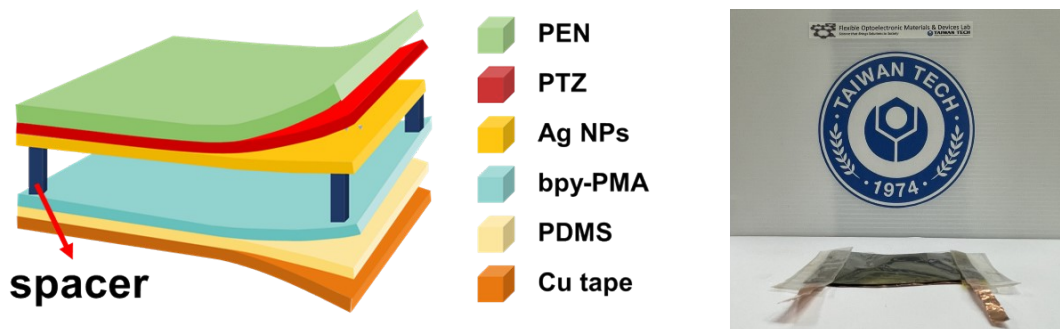

**Fig. S23.** Schematic illustration of the device architecture of flexible TENG (left panel) and a photograph of flexible TENG (right panel).

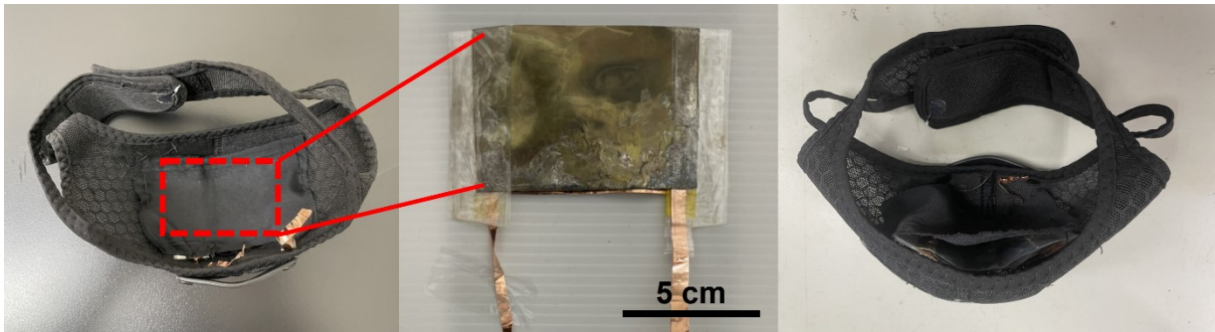

**Fig. S24.** Photographs of self-powered face mask based on flexible TENG (note: bending radius of flexible TENG = 13 mm).

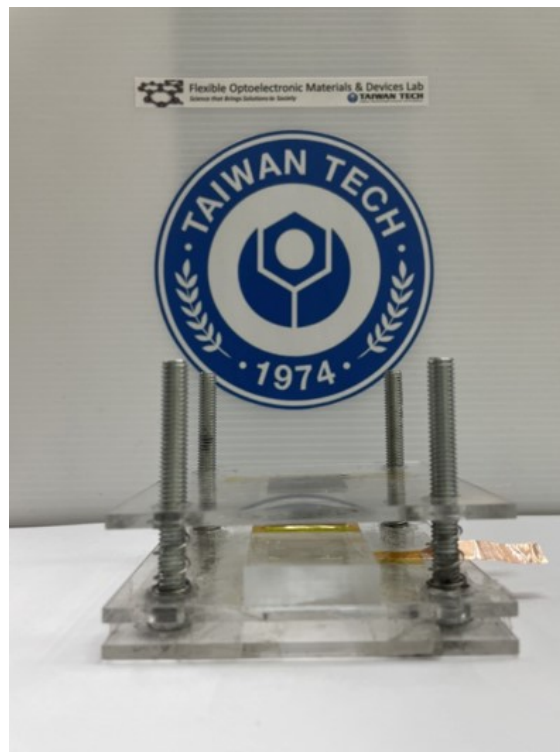

**Fig. S25.** A photograph of as-fabricated TENG.

## References

1. S. Wang, H. Tai, B. Liu, Z. Duan, Z. Yuan, H. Pan, Y. Su, G. Xie, X. Du and Y. Jiang, *Nano Energy*, 2019, **58**, 312-321.
2. S. Cui, Y. Zheng, T. Zhang, D. Wang, F. Zhou and W. Liu, *Nano Energy*, 2018, **49**, 31-39.
3. H. Wang, H. Wu, D. Hasan, T. He, Q. Shi and C. Lee, *ACS Nano*, 2017, **11**, 10337-10346.
4. I. Kim, H. Roh and D. Kim, *Nano Energy*, 2019, **65**, 103990.
5. S.-H. Shin, Y. H. Kwon, Y.-H. Kim, J.-Y. Jung and J. J. N. Nah, 2016, **6**, 186.
6. A. S. M. I. Uddin and G.-S. Chung, *Sens. Actuators B Chem.*, 2017, **245**, 1-10.
7. Y. Su, J. Wang, B. Wang, T. Yang, B. Yang, G. Xie, Y. Zhou, S. Zhang, H. Tai, Z. Cai, G. Chen, Y. Jiang, L.-Q. Chen and J. Chen, *ACS Nano*, 2020, **14**, 6067-6075.
8. A. S. M. I. Uddin, U. Yaqoob and G.-S. Chung, *ACS Appl. Mater. Interfaces*, 2016, **8**, 30079-30089.
9. J. Chang, H. Meng, C. Li, J. Gao, S. Chen, Q. Hu, H. Li and L. Feng, *Adv. Mater. Technol.*, 2020, **5**, 1901087.
10. X. Rong, D. Chen, G. Qu, T. Li, R. Zhang and J. Sun, *Sens. Actuators B Chem.*, 2018, **269**, 223-237.
11. S. Shu, M. Wang, W. Yang and S. Liu, *Sens. Actuators B Chem.*, 2017, **243**, 1171-1180.
12. J. Sun, S. Bai, Y. Tian, Y. Zhao, N. Han, R. Luo, D. Li and A. Chen, *Sens. Actuators B Chem.*, 2018, **257**, 29-36.
13. H. Tian, H. Fan, M. Li and L. Ma, *ACS Sensors*, 2016, **1**, 243-250.
14. L. Zhang, J. Zhao, H. Lu, L. Gong, L. Li, J. Zheng, H. Li and Z. Zhu, *Sens. Actuators B Chem.*, 2011, **160**, 364-370.
15. S. Wang, J. Cao, W. Cui, L. Fan, X. Li and D. Li, *Sens. Actuators B Chem.*, 2018, **255**, 159-165.
16. X. Xing, X. Xiao, L. Wang and Y. Wang, *Sens. Actuators B Chem.*, 2017, **247**, 797-806.
17. R. Xu, L.-X. Zhang, M.-W. Li, Y.-Y. Yin, J. Yin, M.-Y. Zhu, J.-J. Chen, Y. Wang and L.-J. Bie, *Sens. Actuators B Chem.*, 2019, **289**, 186-194.
18. Z. Ye, H. Tai, T. Xie, Z. Yuan, C. Liu and Y. Jiang, *Sens. Actuators B Chem.*, 2016, **223**, 149-156.
19. C. Zhang, J. Wang, R. Hu, Q. Qiao and X. Li, *Sens. Actuators B Chem.*, 2016, **222**, 1134-1143.
20. S. Bai, J. Guo, X. Shu, X. Xiang, R. Luo, D. Li, A. Chen and C. C. Liu, *Sens. Actuators B Chem.*, 2017, **245**, 359-368.
21. Z. Bo, M. Yuan, S. Mao, X. Chen, J. Yan and K. Cen, *Sens. Actuators B Chem.*, 2018, **256**, 1011-1020.
22. H. Chen, J. Hu, G.-D. Li, Q. Gao, C. Wei and X. Zou, *ACS Appl. Mater. Interfaces*, 2017, **9**, 4692-4700.
23. X. Gao, F. Li, R. Wang and T. Zhang, *Sens. Actuators B Chem.*, 2018, **258**, 1230-1241.
24. C. Gu, Y. Cui, L. Wang, E. Sheng, J.-J. Shim and J. Huang, *Sens. Actuators B Chem.*, 2017, **241**, 298-307.
25. J. Hu, T. Wang, Y. Wang, D. Huang, G. He, Y. Han, N. Hu, Y. Su, Z. Zhou, Y. Zhang and Z. Yang, *Sens. Actuators B Chem.*, 2018, **263**, 120-128.
26. N. Li, Y. Fan, Y. Shi, Q. Xiang, X. Wang and J. Xu, *Sens. Actuators B Chem.*, 2019, **294**, 106-115.
27. D. Meng, D. Liu, G. Wang, Y. Shen, X. San, M. Li and F. Meng, *Sens. Actuators B Chem.*, 2018, **273**, 418-428.
28. H. J. Park, J. Kim, N.-J. Choi, H. Song and D.-S. Lee, *ACS Appl. Mater. Interfaces*, 2016, **8**, 3233-3240.
29. X. Chu, T. Chen, W. Zhang, B. Zheng and H. Shui, *Sens. Actuators B Chem.*, 2009, **142**, 49-54.
30. J. A. Dirksen, K. Duval and T. A. Ring, *Sens. Actuators B Chem.*, 2001, **80**, 106-115.
31. N. Han, X. Wu, D. Zhang, G. Shen, H. Liu and Y. Chen, *Sens. Actuators B Chem.*, 2011, **152**, 324-329.
32. N. Han, Y. Tian, X. Wu and Y. Chen, *Sens. Actuators B Chem.*, 2009, **138**, 228-235.
33. E. I. Ionete, S. I. Spiridon, B. F. Monea and E. J. S. Stratulat, *Sensors*, 2019, **19**, 1116.
34. Y.-S. Shim, H. G. Moon, D. H. Kim, L. Zhang, S.-J. Yoon, Y. S. Yoon, C.-Y. Kang and H. W. Jang, *RSC Adv.*, 2013, **3**, 10452-10459.
35. A. J. Kulandaisamy, V. Elavalagan, P. Shankar, G. K. Mani, K. J. Babu and J. B. B. Rayappan, *Ceram. Int.*, 2016, **42**, 18289-18295.
36. Z. Wu, Z. Li, H. Li, M. Sun, S. Han, C. Cai, W. Shen and Y. Fu, *ACS Appl. Mater. Interfaces*, 2019, **11**, 12761-12769.
